# Supplementary material
Source: PubMed Central journal article supplement (PMC3664848)
Supplement: 2f7f753dbfc84793e8735a92b660cda4_genetics.112.146746-2.pdf [file 2f7f753dbfc84793e8735a92b660cda4_genetics.112.146746-2.pdf]

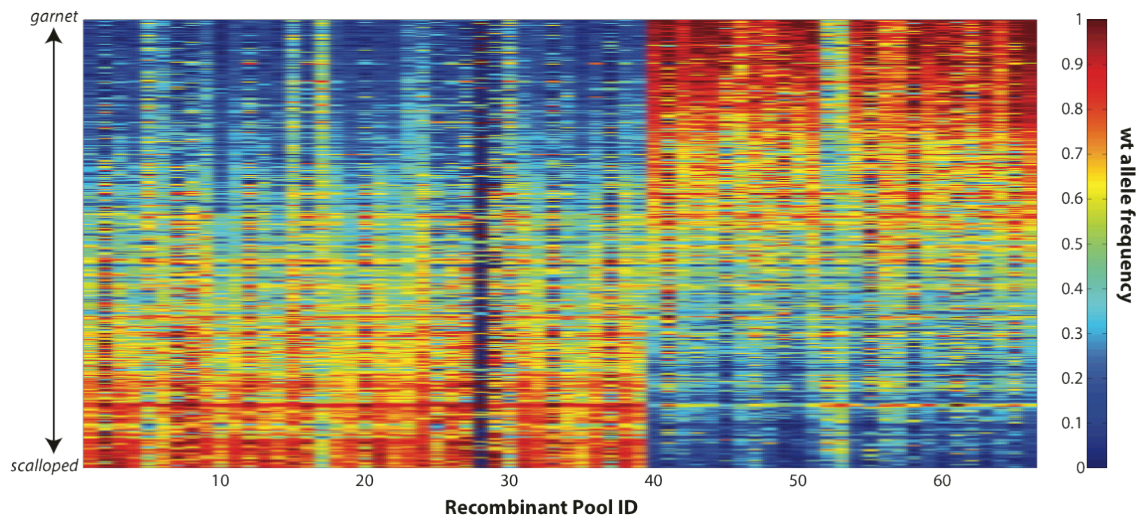

**Figure S2** Heat map depicting the frequency of the wild-type (wt) parental allele at each of 451 SNPs for each of the 66 pools of 100 recombinant males. Each column represents a pool, with the top of the plot representing the 5' end of the *g-sd* region and the bottom representing the 3' end. Note that the expectation is that allele frequencies should start at 0 (blue) and increase to 1 (red) from top to bottom or vice versa, depending on the recombinant phenotype class comprising the pool. The pools are ordered such that all of the *g+* pools are presented first followed by the *+sd* pools. Note that in no pool do the empirical allele frequencies meet the theoretical expectation of varying monotonically across the *g-sd* region. For some pools, this expectation is weakly violated, as might be anticipated from sampling bias and variance. In others, the monotonic trend was weak or imperceptible, suggesting additional sources of variation. Only the former class of pools was used for subsequent analyses.
