# Supplementary material
Source: PubMed Central journal article supplement (PMC3664848)
Supplement: 6ef0fb56d22a6c12b3a2f0df26430abd_genetics.112.146746-4.pdf [file 6ef0fb56d22a6c12b3a2f0df26430abd_genetics.112.146746-4.pdf]

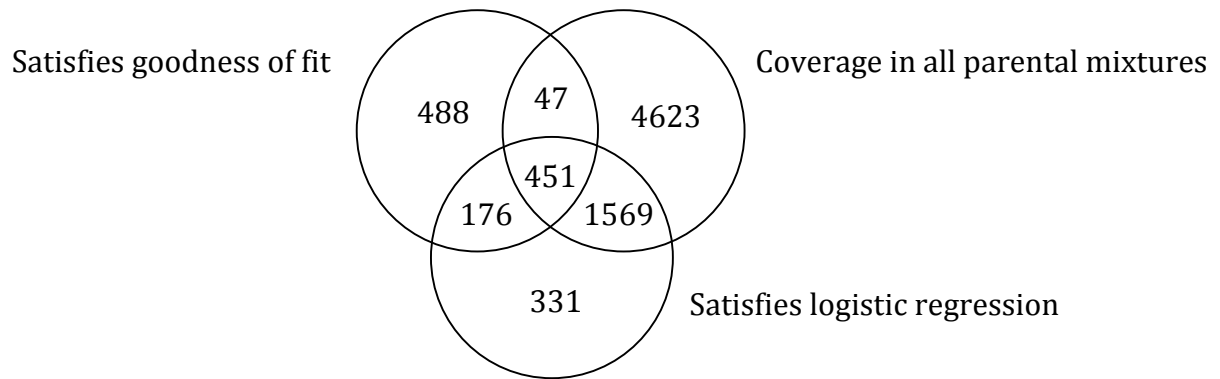

**Figure S1** A Venn diagram illustrating the number of SNPs meeting each of our three filtering criteria. Only those SNPs that met all three criteria (451) were included in our analysis.
