# Supplementary material
Source: PubMed Central journal article supplement (PMC3664848)
Supplement: 333639b90dc8f433a69108baefe772a7_genetics.112.146746-5.pdf [file 333639b90dc8f433a69108baefe772a7_genetics.112.146746-5.pdf]

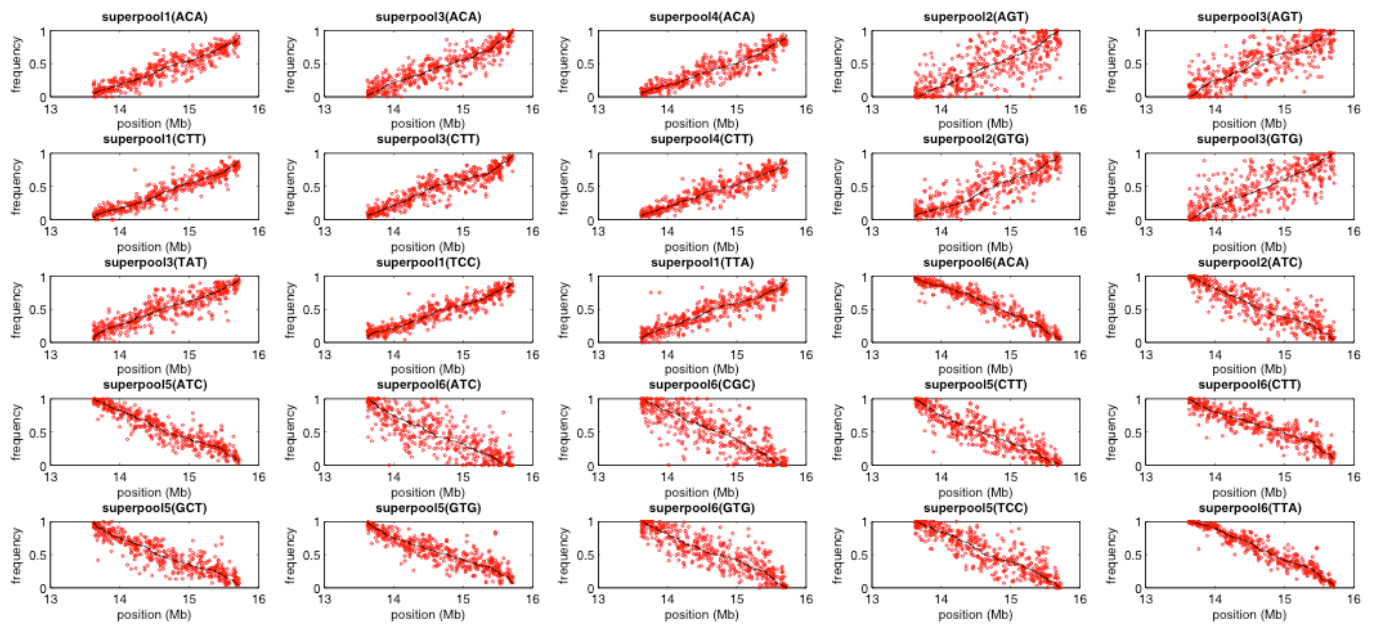

**Figure S3** Raw data (open circles) and median-smoothed data (black line) for each of the 25 pools included in our analysis. Physical position (Mbp) is on the x-axis and frequency of the *g-sd* allele is plotted on the y-axis for each of the 451 SNPs included in our analysis.
